# Supplementary material for: Elucidation of the structural stability and dynamics of heterogeneous intermediate ensembles in unfolding pathway of the N-terminal domain of TDP-43
Source: Royal Society of Chemistry journal article supplement (doi:10.1039/c8ra03368d), 2018-01-01
Supplement: c8ra03368d1.pdf [file c8ra03368d1.pdf]

## Supporting Information

### Elucidation of the Structural Stability and Dynamics of Heterogeneous Intermediate Ensembles in Urea Induced Unfolding of the N-Terminal Domain of TDP-43

Amresh Prakash<sup>1\*</sup>, Vijay Kumar<sup>2\*</sup>, Naveen Kumar Meena<sup>1</sup> and Andrew. M. Lynn<sup>1</sup>

<sup>1</sup>School of Computational & Integrative Sciences, Jawaharlal Nehru University, New Delhi-110067, India

<sup>2</sup>Centre for Interdisciplinary Research in Basic Sciences, Jamia Millia Islamia, New Delhi-110025, India

**Table S1.**

| Run id | Temp. (K) | length (ns) | RMSD (highest) (nm) | U visited | MG visited | IU visited |
|--------|-----------|-------------|---------------------|-----------|------------|------------|
| 01     | 300*      | 500         | 1.24                | No        | No         | No         |
| 02     | 300       | 500         | 1.44                | No        | No         | No         |
| 03     | 350       | 500         | 2.16                | Yes       | Yes        | Yes        |
| 04     | 400       | 500         | 2.78                | Yes       | No         | No         |
| 05     | 450       | 500         | 2.84                | Yes       | No         | No         |
| 06     | 500       | 250         | 3.65                | Yes       | No         | No         |

All simulations were performed in aqueous 8 M urea solution at 1 atm pressure. The population of IU was determined on the basis of the following criterion:  $0.25 \leq Q \leq 0.5$ . \*The simulation carried out in pure water at 300 K for the period of 500 ns.

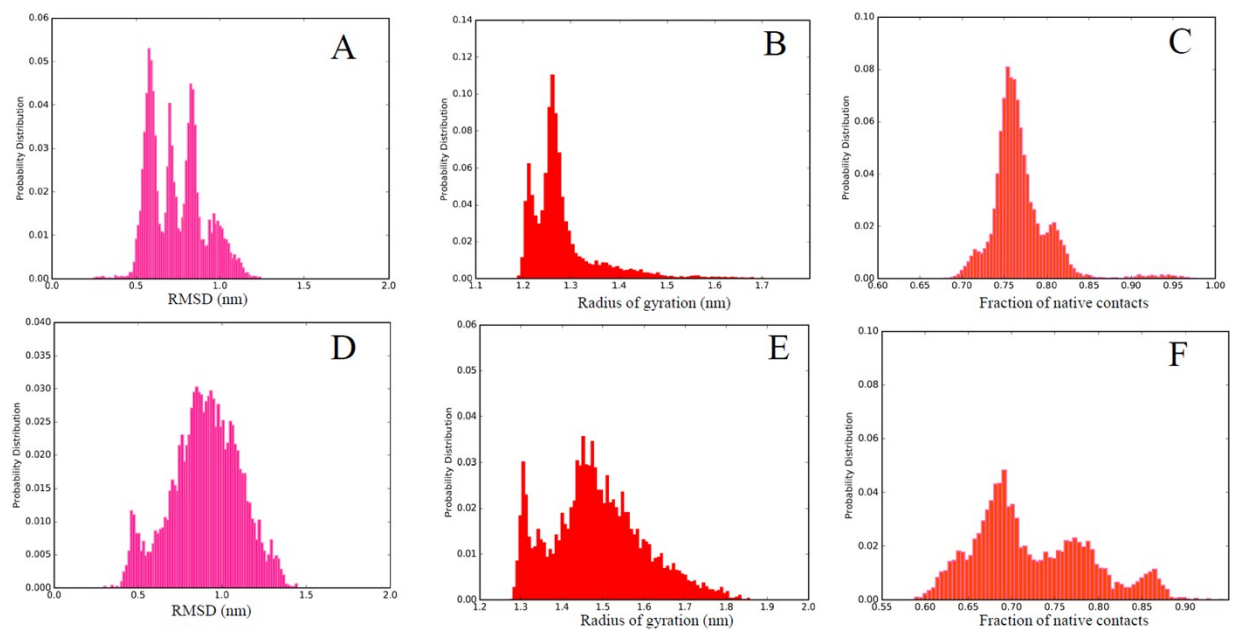

**Figure S1.** Probability distribution of RMSD, Rg, Nc of NTD in water (A-C) and in 8M urea (D-F) at 300 K.

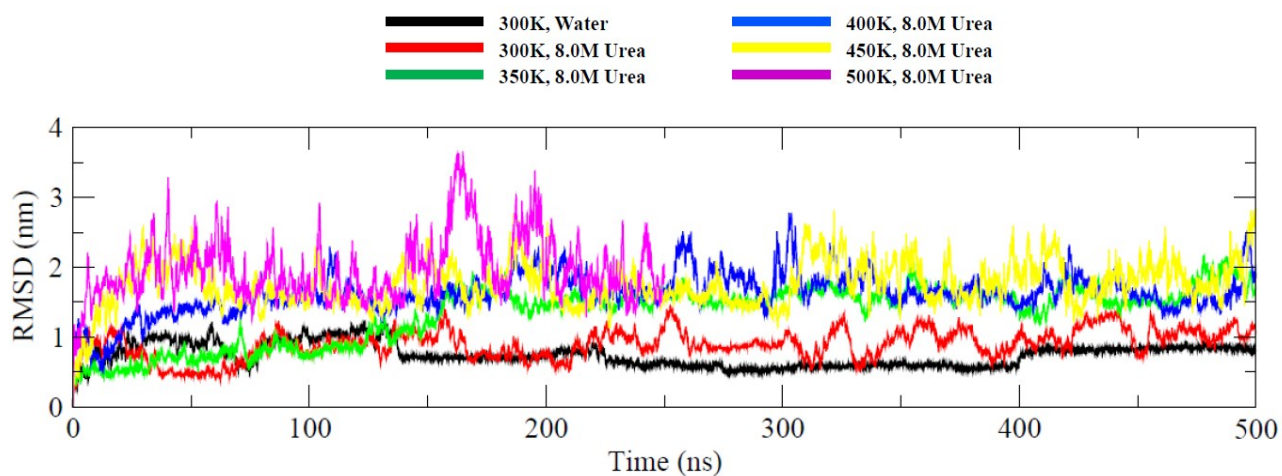

**Figure S2A.** Time evolution plot of all-atoms  $C_{\alpha}$  RMSD in water and 8 M urea at different temperatures.

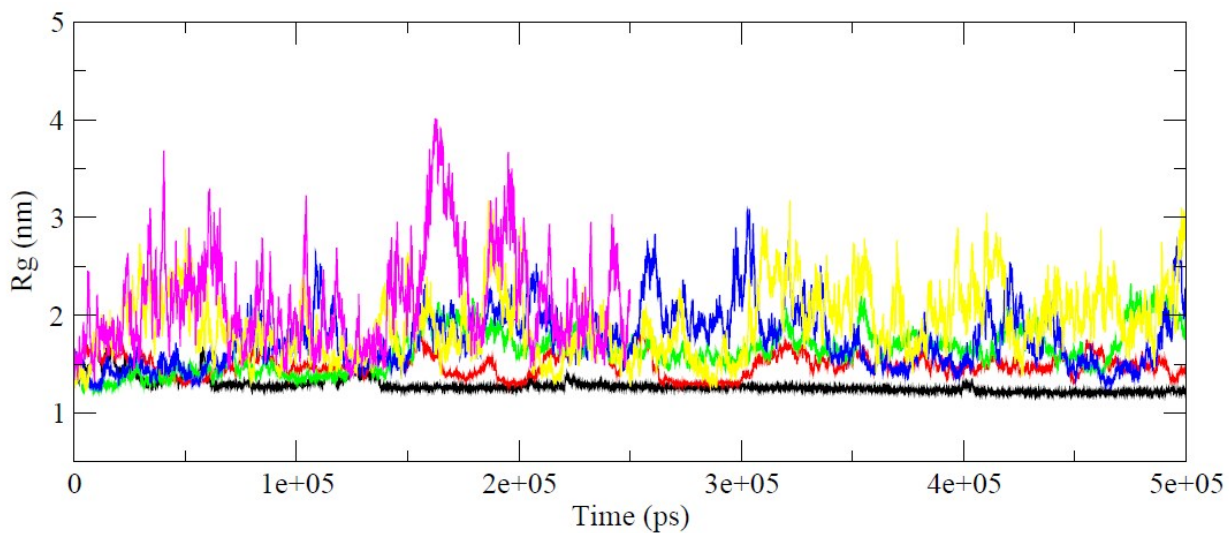

**Figure S2B.** Time evolution plot of radius of gyration ( $R_g$ ) of all  $C_{\alpha}$  atoms in water and 8 M urea at different temperatures. Color scheme as labelled above.

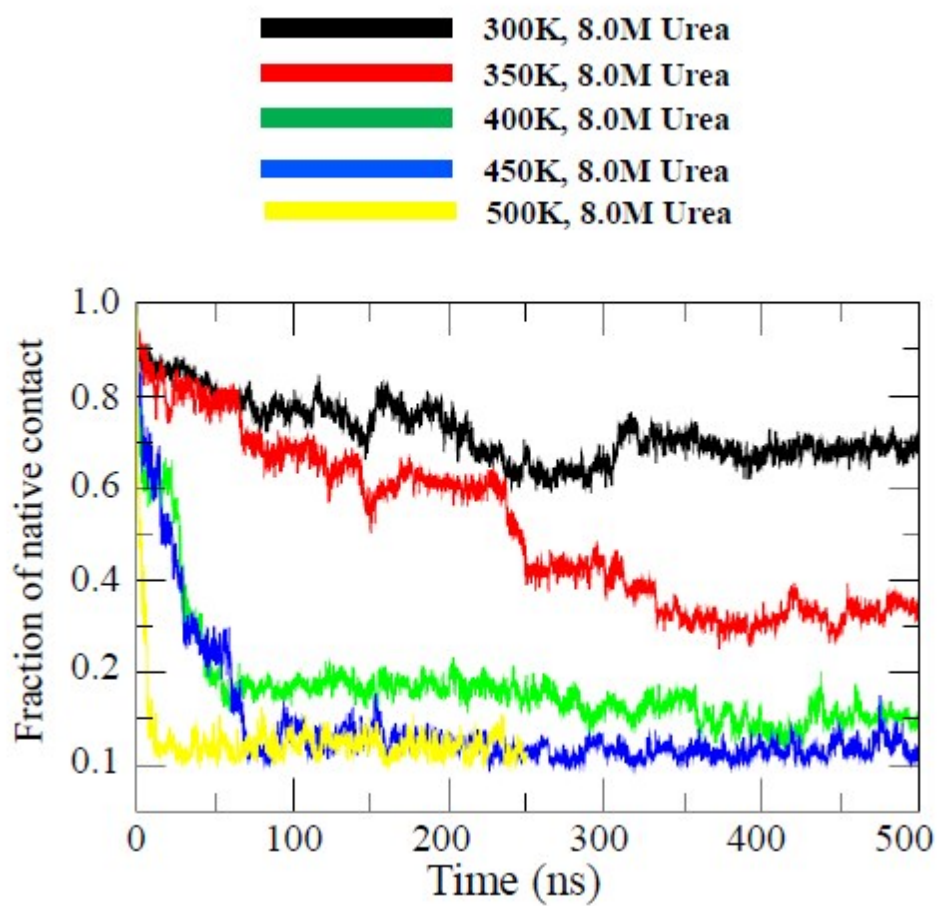

**Figure S2C.** Time evolution of the fraction of native contact in 8 M urea at different temperatures (300-500K). Color scheme as labelled above.

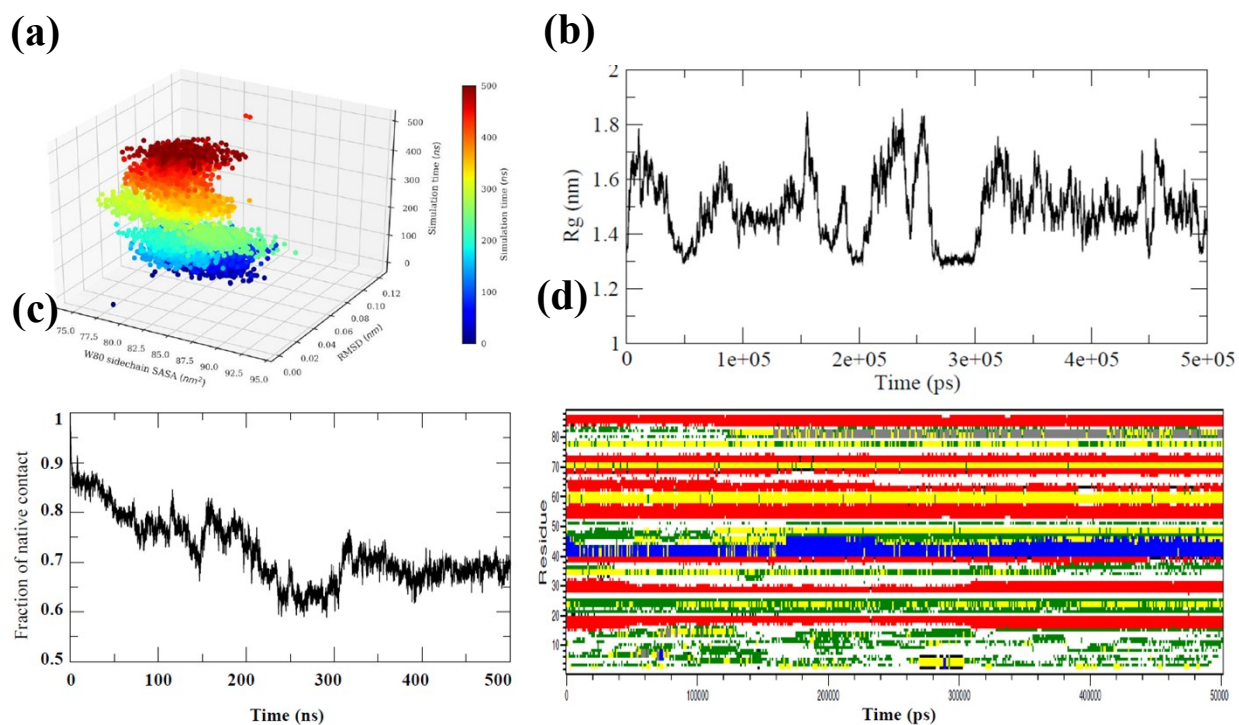

**Figure S3.** Unfolding pathways of NTD in 8 M urea at 300 K. (a) Evolution of the solvent-exposed surface area, SASA of W80 side chain and C $\alpha$ -RMSD during unfolding. Each point on this plot is colored according to its time of occurrence, with the color scale shown. Time evolution of (b)  $R_g$ , (c) Nc, and (d) secondary structure.

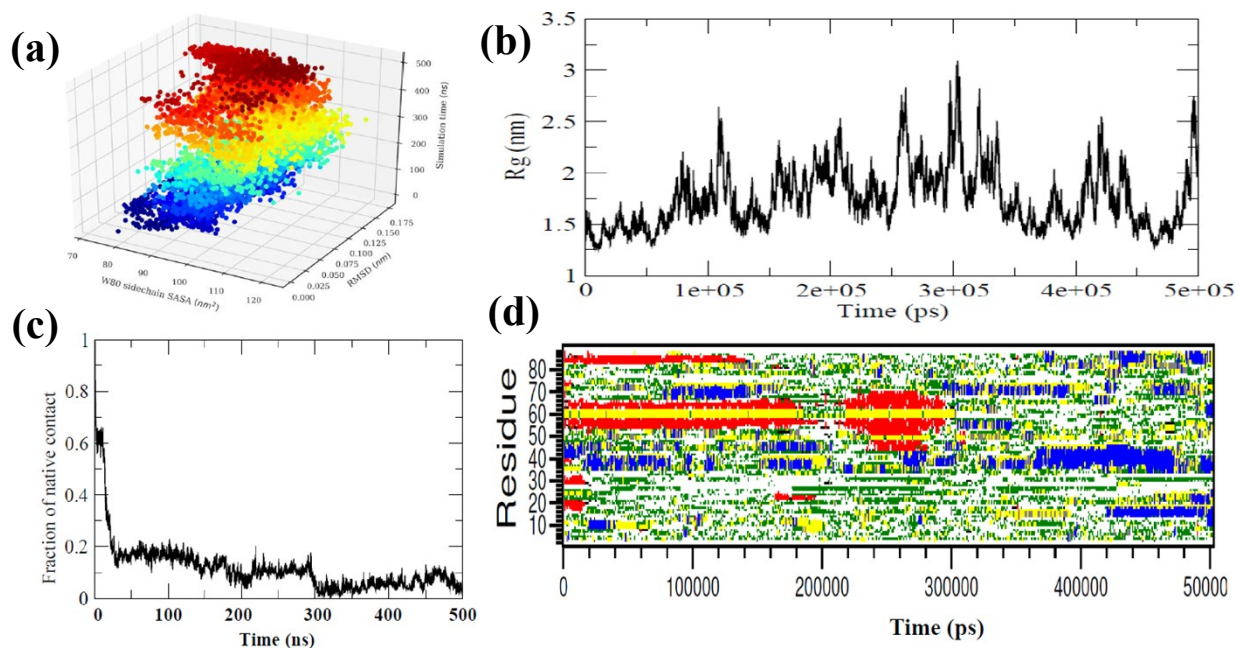

**Figure S4.** Unfolding pathways of NTD in 8 M urea at 400 K. (a) Evolution of the solvent-exposed surface area, SASA of W80 side chain and C $\alpha$ -RMSD during unfolding. Each point on this plot is colored according to its time of occurrence, with the color scale shown. Time evolution of (b)  $R_g$ , (c) Nc, and (d) secondary structure.



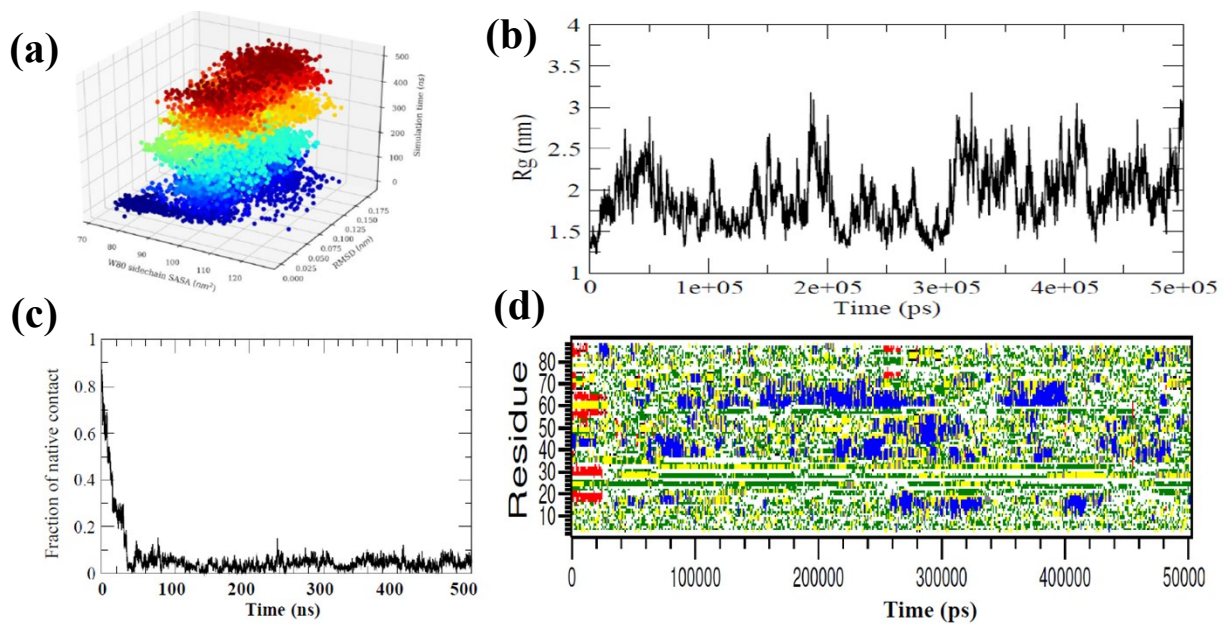

**Figure S5.** Unfolding pathways of NTD in 8 M urea at 450 K. (a) Evolution of the solvent-exposed surface area, SASA of W80 side chain and C $\alpha$ -RMSD during unfolding. Each point on this plot is colored according to its time of occurrence, with the color scale shown. Time evolution of (b)  $R_g$ , (c) Nc, and (d) secondary structure.

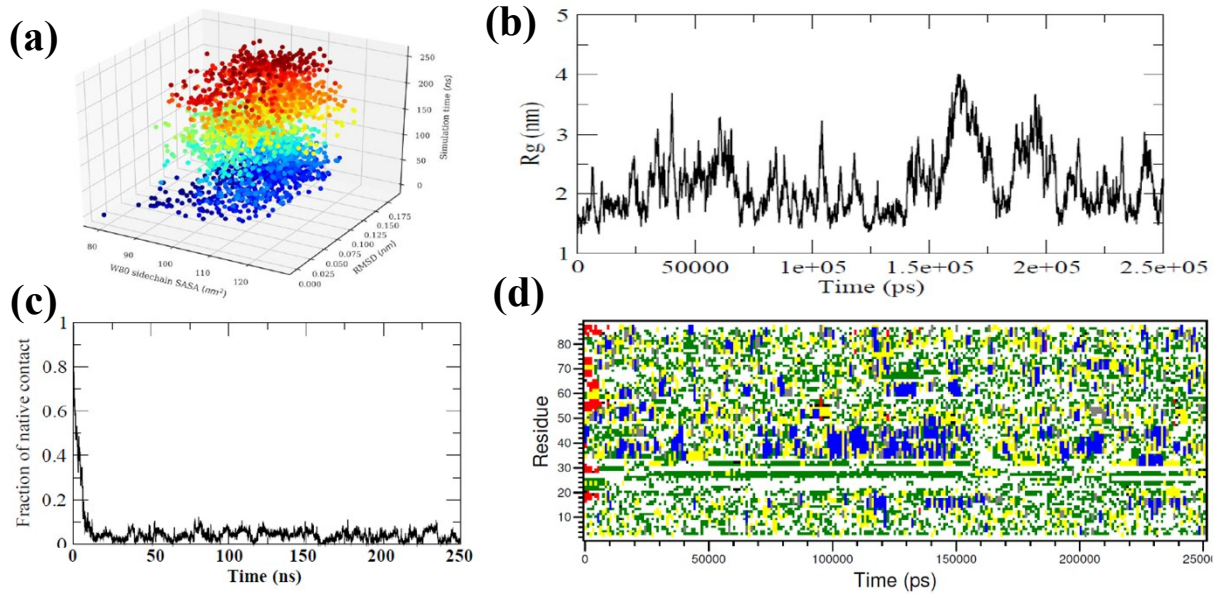

**Figure S6.** Unfolding pathways of NTD in 8 M urea at 500 K. (a) Evolution of the solvent-exposed surface area, SASA of W80 side chain and C $\alpha$ -RMSD during unfolding. Each point on this plot is colored according to its time of occurrence, with the color scale shown. Time evolution of (b)  $R_g$ , (c) Nc, and (d) secondary structure.



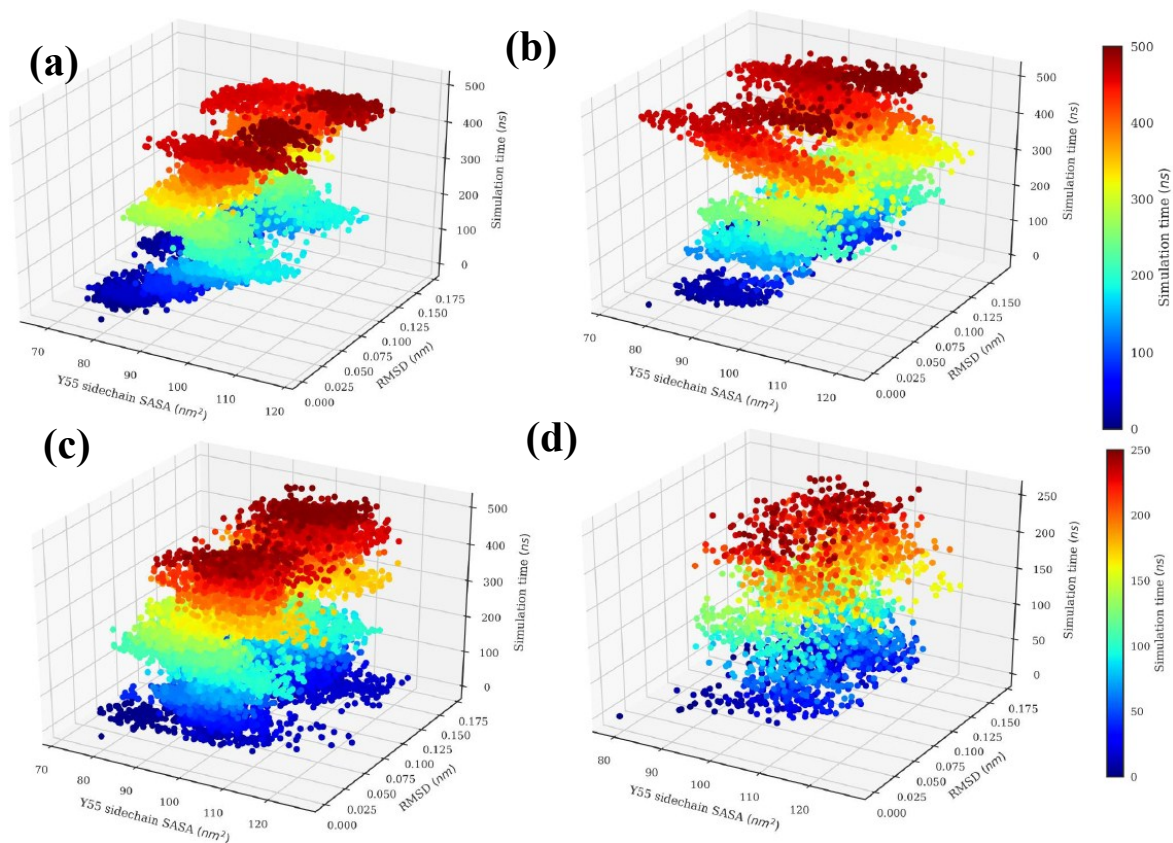

**Figure S7.** Time evolution of  $C_{\alpha}$  RMSD and SASA of side chain of Y55 in 8M urea at (a) 350 K, (b) 4000 K, (c) 450 K and (d) 500 K. Each point on this plot is colored according to its time of occurrence with the color scale shown.

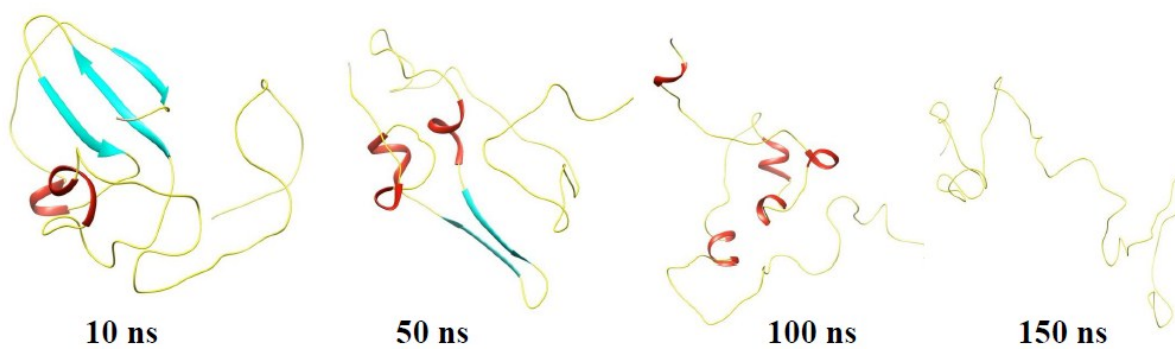

**Figure S8.** Snapshots of representative conformational states observed during unfolding pathway of NTD in 8 M urea at 400K.

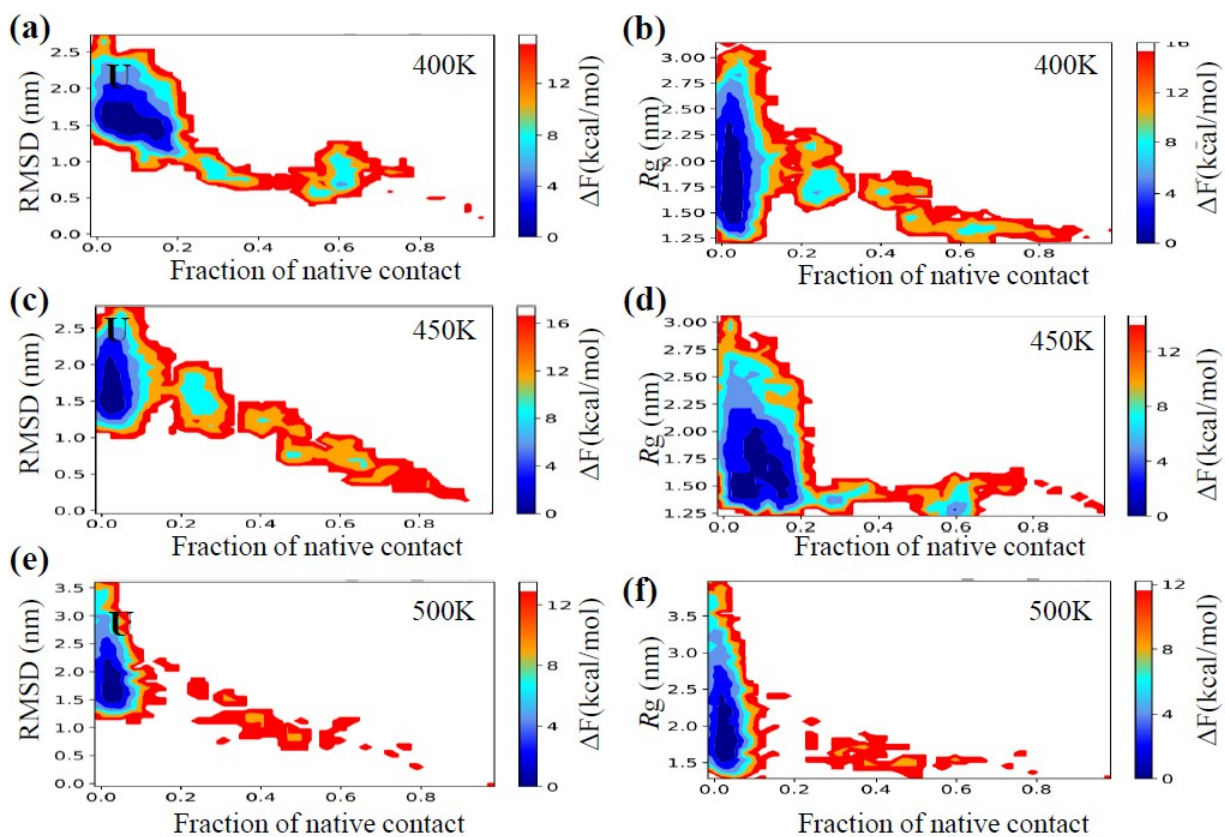

**Figure S9.** Free-energy landscape of unfolding dynamics of NTD at higher temperature. At higher temperatures (400K-500K) protein unfolded readily, as plot shows the single energy basin populated with unfolded conformations having almost complete loss of native contacts.

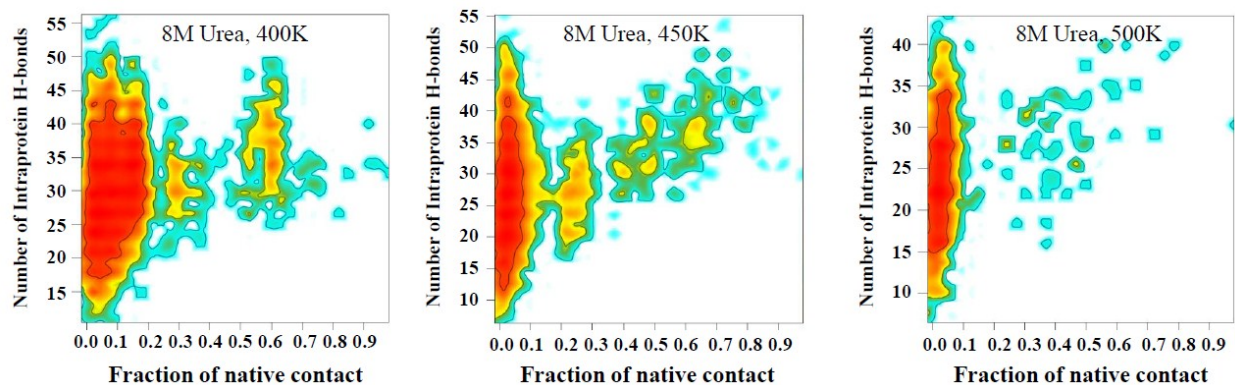

**Figure S10.** Free-energy landscape involving the fraction of native contacts vs number of intraprotein H-bonds in denaturant (8M Urea) at higher temperatures (400K, 450K and 500K). Plots showed readily loss of h-bonds that is provided the clear evidence of rapid unfolding at higher temperatures.

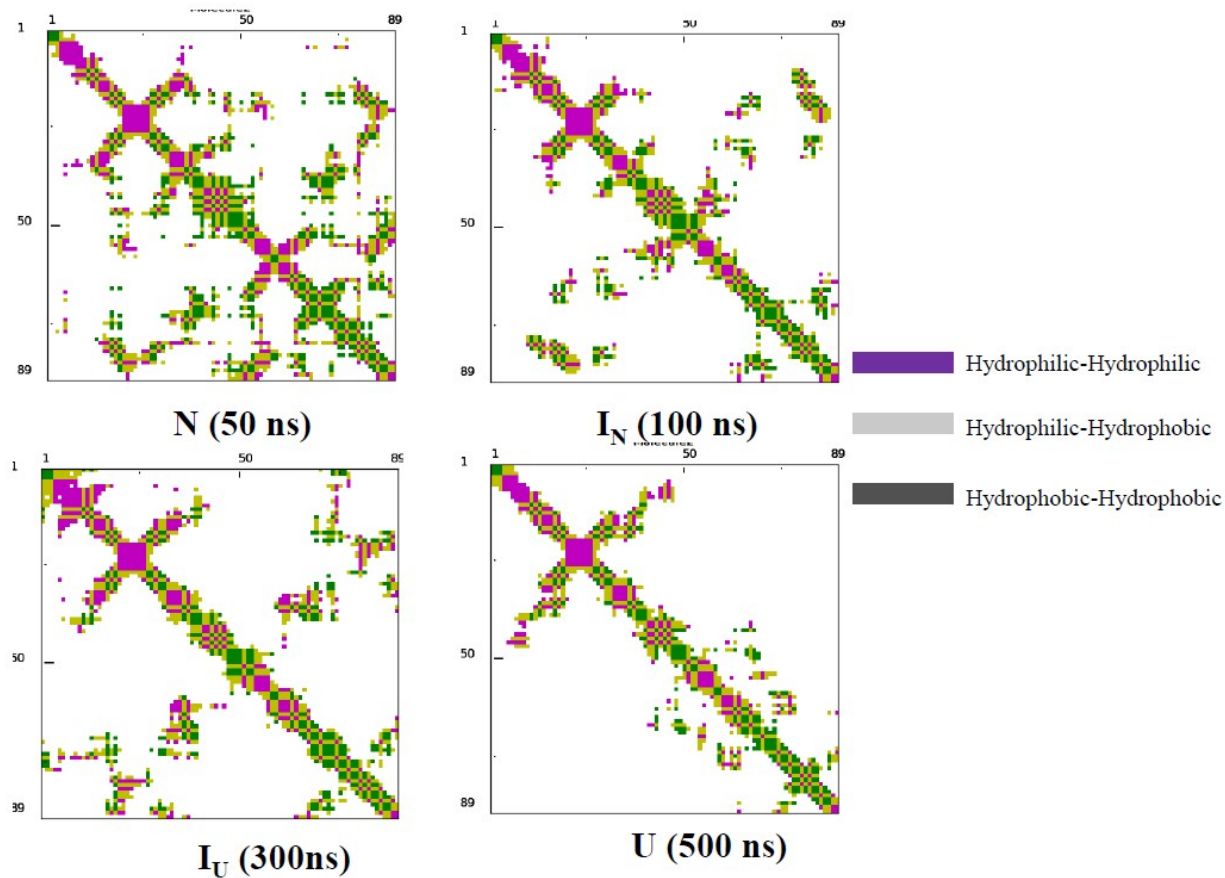

**Figure S11.** Inter-residual contact map of the different unfolded states of NTD obtained from the MD simulation plotted by COCOMAPS.
